# Supplementary material for: Safety and short-term outcomes of esophagectomy after neoadjuvant immunotherapy combined with chemotherapy or chemoradiotherapy for locally advanced esophageal squamous cell cancer: analysis of two phase-II clinical trials
Source: PubMed Central journal article supplement — J Gastrointest Oncol. 2024 Jun 27;15(3):841–50. doi: 10.21037/jgo-24-295 (PMC11231833; doi:10.21037/jgo-24-295), 2024-06-27
Supplement: jgo-15-03-841-dss.pdf [file jgo-15-03-841-dss.pdf]

## Data Sharing Statement

|                     |                                                                                                                                                     |                                                                                                                                            |
|---------------------|-----------------------------------------------------------------------------------------------------------------------------------------------------|--------------------------------------------------------------------------------------------------------------------------------------------|
| <b>Article Info</b> | <a href="https://dx.doi.org/10.21037/jgo-24-295">https://dx.doi.org/10.21037/jgo-24-295</a>                                                         |                                                                                                                                            |
| <b>Item</b>         | <b>Question</b>                                                                                                                                     | <b>Authors' Response<br/>(place "-" if not applicable)</b>                                                                                 |
| 1                   | Would you like to share data collected for your study to others?                                                                                    | Yes.                                                                                                                                       |
| 2                   | If not, would you like to share the reason for your decision?                                                                                       | -                                                                                                                                          |
| 3                   | What data in particular will be shared?                                                                                                             | The postoperative complications data in particular will be shared.                                                                         |
| 4                   | Any other documents will be shared? Such as study protocol, statistical analysis plan, informed consent form, clinical study report, analytic code. | Statistical analysis plan, informed consent form, and clinical study report will also be shared if requested.                              |
| 5                   | When will data availability begin?                                                                                                                  | From the publication date.                                                                                                                 |
| 6                   | When will data availability end?                                                                                                                    | Two years within the publication date.                                                                                                     |
| 7                   | To whom will you share the data?                                                                                                                    | Medical oncologists and thoracic surgeons who are interested in studies of locally advanced esophageal squamous cell cancer.               |
| 8                   | For what type of analysis or purpose?                                                                                                               | For analysis to evaluate the safety of esophagectomy after neoadjuvant immunotherapy for locally advanced esophageal squamous cell cancer. |
| 9                   | How or where can the data/documents be obtained?                                                                                                    | Emails could be sent to the address below to obtain the shared data: shendj@zjcc.org.cn.                                                   |
| 10                  | Any other restrictions?                                                                                                                             | We may balance the potential benefits and risks for each request and then provide the data that could be shared.                           |
